# Supplementary material
Source: Springer Nature journal article supplement (https://www.springermedizin.de/resource/supplementary/12968_2013_3357_MOESM7_ESM.pdf/9583488)
Supplement: MOESM7 [file 9583488]

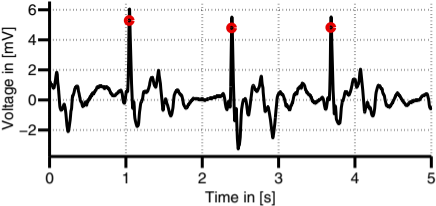

(a) IC dominated by the ECG

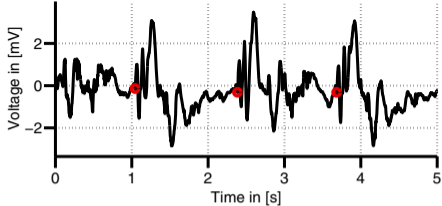

(b) IC dominated by the ECG and MHD

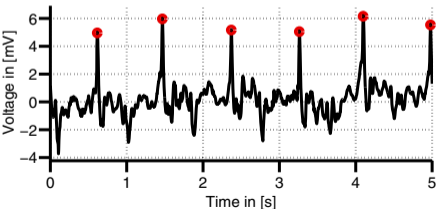

(c) IC dominated by the ECG

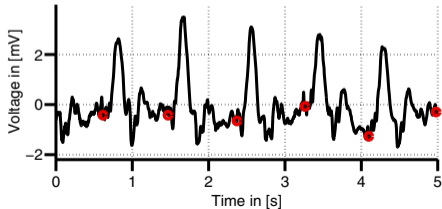

(d) IC dominated by the MHD effect
